# Supplementary material for: Understanding the effect of nanoconfinement on the structure of water hydrogen bond networks
Source: Royal Society of Chemistry journal article supplement (doi:10.1039/c9cp05014k), 2019-01-01
Supplement: c9cp05014k1.pdf [file c9cp05014k1.pdf]

# Supporting Information:

## Understanding the Effect of Nanoconfinement on the Structure of Water Hydrogen Bond Networks

Myong In Oh,<sup>†</sup> Mayuri Gupta,<sup>†</sup> Chang In Oh,<sup>‡</sup> and Donald F. Weaver<sup>\*,†,¶,§,||</sup>

*<sup>†</sup>Krembil Research Institute, University Health Network, Toronto, Ontario, Canada M5T 0S8*

*<sup>‡</sup>Department of Mathematics, University of Western Ontario, London, Ontario, Canada N6A 5B7*

*<sup>¶</sup>Department of Chemistry, University of Toronto, Toronto, Ontario, Canada M5S 3H6*

*<sup>§</sup>Department of Medicine, University of Toronto, Toronto, Ontario, Canada M5G 2C4*

*<sup>||</sup>Department of Pharmaceutical Sciences, University of Toronto, Toronto, Ontario, Canada M5S*

*3M2*

E-mail: [dweaver@uhnres.utoronto.ca](mailto:dweaver@uhnres.utoronto.ca)

# S1 Orientational Distribution of Hydrogen Bonds in DG and DLM

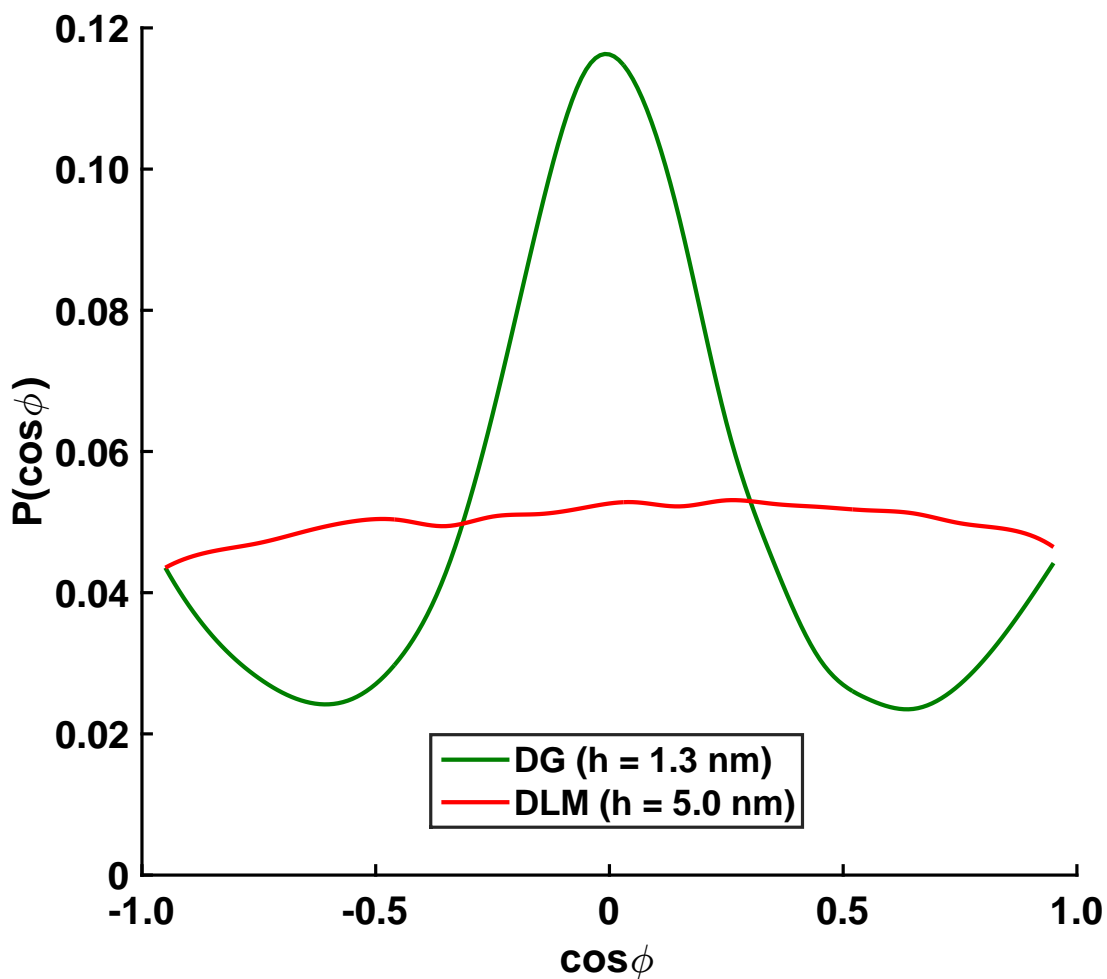

Figure S1: Normalized orientational distributions of hydrogen bonds in DG (green) and DLM (red) where  $\phi$  is the angle between a hydrogen bond and the surface normal.
